# Supplementary material for: Bacterial community mapping of the intestinal tract in acute pancreatitis rats based on 16S rDNA gene sequence analysis
Source: PubMed Central journal article supplement — RSC Adv. 2019 Feb 11;9(9):5025–36. doi: 10.1039/c8ra09547g (PMC9060666; doi:10.1039/c8ra09547g), 2019-02-11
Supplement: RA-009-C8RA09547G-s001.pdf [file RA-009-C8RA09547G-s001.pdf]

**Supplementary Table S1 Statistical results of high-quality clean tags**

| <b>Sample</b> | <b>Raw_Tags</b> | <b>Valid_Tags</b> | <b>Valid%</b> | <b>Q20%</b> | <b>Q30%</b> |
|---------------|-----------------|-------------------|---------------|-------------|-------------|
| Con_S_1       | 37008           | 16714             | 45.16         | 99.41       | 96.54       |
| Con_S_2       | 40522           | 18963             | 46.80         | 99.39       | 96.43       |
| Con_S_3       | 39772           | 18628             | 46.84         | 99.43       | 96.55       |
| Con_S_4       | 48840           | 19947             | 40.84         | 99.43       | 96.66       |
| Con_S_5       | 51938           | 21915             | 42.19         | 99.44       | 96.75       |
| Con_S_6       | 42848           | 19637             | 45.83         | 99.42       | 96.63       |
| Con_C_1       | 27908           | 13052             | 46.77         | 99.43       | 96.61       |
| Con_C_2       | 26166           | 12383             | 47.32         | 99.45       | 96.84       |
| Con_C_3       | 25810           | 11151             | 43.20         | 99.43       | 96.77       |
| Con_C_4       | 46272           | 21679             | 46.85         | 99.37       | 96.48       |
| Con_C_5       | 24702           | 11141             | 45.10         | 99.39       | 96.50       |
| Con_C_6       | 68240           | 31850             | 46.67         | 99.39       | 96.49       |
| Con_F_1       | 57192           | 26811             | 46.88         | 99.10       | 95.00       |
| Con_F_2       | 56856           | 26365             | 46.37         | 99.12       | 95.15       |
| Con_F_3       | 71306           | 33018             | 46.30         | 99.14       | 95.24       |
| Con_F_4       | 71108           | 32358             | 45.51         | 99.14       | 95.31       |
| Con_F_5       | 39800           | 17896             | 44.96         | 98.71       | 93.28       |
| Con_F_6       | 66744           | 31478             | 47.16         | 99.12       | 95.18       |
| AP_S_1        | 40776           | 12357             | 30.30         | 95.76       | 83.39       |
| AP_S_2        | 27596           | 12673             | 45.92         | 99.02       | 94.80       |
| AP_S_3        | 39782           | 17435             | 43.83         | 98.92       | 94.36       |
| AP_S_4        | 33502           | 15609             | 46.59         | 98.98       | 94.58       |
| AP_S_5        | 36282           | 16911             | 46.61         | 99.00       | 94.63       |
| AP_S_6        | 38606           | 17474             | 45.26         | 99.10       | 95.16       |
| AP_C_1        | 32728           | 15457             | 47.23         | 99.09       | 95.01       |
| AP_C_2        | 28966           | 13720             | 47.37         | 98.98       | 94.47       |
| AP_C_3        | 38596           | 18362             | 47.57         | 99.13       | 95.27       |
| AP_C_4        | 68018           | 31091             | 45.71         | 98.86       | 94.12       |
| AP_C_5        | 37320           | 17403             | 46.63         | 99.50       | 97.10       |
| AP_C_6        | 57896           | 27305             | 47.16         | 98.99       | 94.62       |
| AP_F_1        | 48946           | 22707             | 46.39         | 98.99       | 94.66       |
| AP_F_2        | 69448           | 31967             | 46.03         | 98.72       | 93.26       |
| AP_F_3        | 51606           | 23203             | 44.96         | 98.75       | 93.40       |
| AP_F_4        | 52990           | 24028             | 45.34         | 98.67       | 92.99       |
| AP_F_5        | 49878           | 22620             | 45.35         | 98.95       | 94.40       |
| AP_F_6        | 53564           | 23834             | 44.50         | 99.00       | 94.62       |

**Supplementary Table S2 Statistical results of OTUs in small intestine of AP rats**

| <b>OTU ID</b> | <b>AP_S_1</b> | <b>AP_S_2</b> | <b>AP_S_3</b> | <b>AP_S_4</b> | <b>AP_S_5</b> | <b>AP_S_6</b> | <b>Taxonomy</b>                    |
|---------------|---------------|---------------|---------------|---------------|---------------|---------------|------------------------------------|
| OTU24         | 185.00        | 612.00        | 568.00        | 289.00        | 5129.00       | 5566.00       | s__Lactobacillus_unclassified      |
| OTU663        | 15.00         | 21.00         | 19.00         | 6.00          | 157.00        | 161.00        | s__Bacilli_unclassified            |
| OTU531        | 1.00          | 4.00          | 2.00          | 7.00          | 6.00          | 5.00          | s__Porphyromonadaceae_unclassified |
| OTU4000       | 77.00         | 255.00        | 1275.00       | 388.00        | 867.00        | 944.00        | s__Romboutsia_unclassified         |
| OTU528        | 66.00         | 7.00          | 13.00         | 9.00          | 240.00        | 252.00        | s__Lactobacillus_unclassified      |
| OTU8046       | 260.00        | 17.00         | 39.00         | 11.00         | 218.00        | 149.00        | s__uncultured_Lactobacillus_sp.    |
| OTU427        | 215.00        | 84.00         | 84.00         | 73.00         | 804.00        | 879.00        | s__Lactobacillus_murinus           |
| OTU39         | 30.00         | 106.00        | 186.00        | 343.00        | 698.00        | 726.00        | s__Turicibacter_unclassified       |
| OTU6321       | 1.00          | 3.00          | 2.00          | 16.00         | 55.00         | 82.00         | s__Clostridiaceae_1_unclassified   |
| OTU8          | 1036.00       | 624.00        | 914.00        | 1584.00       | 689.00        | 651.00        | s__Lactobacillus_mucosae           |
| OTU49         | 175.00        | 441.00        | 448.00        | 2796.00       | 152.00        | 133.00        | s__Lactobacillus_sp._L-YJ          |
| OTU31         | 695.00        | 1215.00       | 1971.00       | 1022.00       | 1110.00       | 1094.00       | s__Lactobacillus_unclassified      |
| OTU20         | 4.00          | 16.00         | 37.00         | 1009.00       | 469.00        | 510.00        | s__Escherichia_unclassified        |
| OTU52         | 13.00         | 997.00        | 137.00        | 231.00        | 69.00         | 68.00         | s__Streptococcus_sp._GDLAMI-SD2    |
| OTU74         | 28.00         | 1926.00       | 749.00        | 144.00        | 123.00        | 115.00        | s__Gemella_unclassified            |
| OTU326        | 2027.00       | 322.00        | 551.00        | 338.00        | 322.00        | 311.00        | s__Lactobacillus_unclassified      |
| OTU330        | 407.00        | 101.00        | 122.00        | 792.00        | 34.00         | 41.00         | s__uncultured_Lactobacillus_sp.    |
| OTU48         | 446.00        | 221.00        | 446.00        | 2260.00       | 19.00         | 36.00         | s__Lactobacillus_unclassified      |
| OTU450        | 46.00         | 5.00          | 18.00         | 34.00         | 67.00         | 38.00         | s__Aerococcaceae_unclassified      |
| OTU8197       | 38.00         | 6.00          | 22.00         | 2.00          | 13.00         | 10.00         | s__Romboutsia_unclassified         |
| OTU3394       | 4.00          | 70.00         | 78.00         | 163.00        | 13.00         | 18.00         | s__Rothia_unclassified             |

|         |        |        |        |        |        |        |                                           |
|---------|--------|--------|--------|--------|--------|--------|-------------------------------------------|
| OTU3785 | 2.00   | 70.00  | 5.00   | 4.00   | 342.00 | 332.00 | s__Clostridium sensu stricto_unclassified |
| OTU1524 | 16.00  | 10.00  | 22.00  | 371.00 | 154.00 | 179.00 | s__Enterobacteriaceae_unclassified        |
| OTU715  | 76.00  | 10.00  | 7.00   | 30.00  | 19.00  | 13.00  | s__Lactobacillus_reuteri                  |
| OTU6629 | 12.00  | 13.00  | 80.00  | 20.00  | 56.00  | 68.00  | s__Peptostreptococcaceae_unclassified     |
| OTU152  | 255.00 | 126.00 | 1.00   | 2.00   | 41.00  | 33.00  | s__Pasteurellaceae_unclassified           |
| OTU28   | 15.00  | 269.00 | 133.00 | 36.00  | 37.00  | 36.00  | s__Veillonella_unclassified               |
| OTU758  | 133.00 | 485.00 | 212.00 | 43.00  | 45.00  | 43.00  | s__Bacillales_unclassified                |
| OTU110  | 1.00   | 118.00 | 71.00  | 39.00  | 6.00   | 9.00   | s__Streptococcus_unclassified             |
| OTU918  | 10.00  | 82.00  | 371.00 | 10.00  | 24.00  | 11.00  | s__uncultured_Anaerorhabdus_sp.           |
| OTU154  | 7.00   | 828.00 | 1.00   | 1.00   | 20.00  | 28.00  | s__Granulicatella_unclassified            |
| OTU8317 | 134.00 | 19.00  | 12.00  | 49.00  | 2.00   | 1.00   | s__Lactobacillus_gasseri                  |
| OTU85   | 2.00   | 2.00   | 4.00   | 7.00   | 4.00   | 10.00  | s__Globicatella_sp._canine_oral_taxon_107 |
| OTU8368 | 27.00  | 1.00   | 9.00   | 3.00   | 8.00   | 4.00   | s__Romboutsia_unclassified                |
| OTU7763 | 14.00  | 2.00   | 8.00   | 1.00   | 4.00   | 2.00   | s__Peptostreptococcaceae_unclassified     |
| OTU132  | 8.00   | 805.00 | 206.00 | 81.00  | 5.00   | 8.00   | s__Globicatella_sp._canine_oral_taxon_218 |
| OTU7411 | 35.00  | 21.00  | 83.00  | 6.00   | 6.00   | 1.00   | s__Romboutsia_unclassified                |
| OTU8838 | 83.00  | 4.00   | 6.00   | 5.00   | 2.00   | 5.00   | s__uncultured_Lactobacillus_sp.           |
| OTU557  | 33.00  | 184.00 | 67.00  | 26.00  | 3.00   | 4.00   | s__Firmicutes_unclassified                |
| OTU8501 | 59.00  | 2.00   | 4.00   | 1.00   | 7.00   | 1.00   | s__Lactobacillales_unclassified           |
| OTU134  | 1.00   | 254.00 | 125.00 | 85.00  | 5.00   | 2.00   | s__Facklamia_unclassified                 |
| OTU673  | 52.00  | 2.00   | 2.00   | 2.00   | 4.00   | 1.00   | s__Bacteria_unclassified                  |
| OTU485  | 5.00   | 17.00  | 34.00  | 2.00   | 2.00   | 1.00   | s__Bacteroides_uniformis                  |

**Supplementary Table S3 Statistical results of OTUs in colon of AP rats**

| OTU ID  | AP_C_1  | AP_C_2  | AP_C_3   | AP_C_4   | AP_C_5  | AP_C_6  | Taxonomy                                  |
|---------|---------|---------|----------|----------|---------|---------|-------------------------------------------|
| OTU24   | 16.00   | 396.00  | 11.00    | 534.00   | 764.00  | 942.00  | s__Lactobacillus_unclassified             |
| OTU4000 | 8268.00 | 9560.00 | 12480.00 | 3273.00  | 170.00  | 454.00  | s__Romboutsia_unclassified                |
| OTU3722 | 1619.00 | 445.00  | 1848.00  | 1115.00  | 35.00   | 26.00   | s__Clostridium sensu stricto_unclassified |
| OTU427  | 1.00    | 78.00   | 3.00     | 107.00   | 34.00   | 165.00  | s__Lactobacillus_murinus                  |
| OTU39   | 12.00   | 522.00  | 54.00    | 12283.00 | 393.00  | 523.00  | s__Turicibacter_unclassified              |
| OTU8    | 18.00   | 32.00   | 22.00    | 778.00   | 370.00  | 1073.00 | s__Lactobacillus_mucosae                  |
| OTU49   | 9.00    | 20.00   | 11.00    | 2302.00  | 2194.00 | 3418.00 | s__Lactobacillus_sp._L-YJ                 |
| OTU31   | 20.00   | 76.00   | 30.00    | 1940.00  | 468.00  | 1620.00 | s__Lactobacillus_unclassified             |
| OTU20   | 587.00  | 2.00    | 51.00    | 47.00    | 2452.00 | 2396.00 | s__Escherichia_unclassified               |
| OTU52   | 17.00   | 33.00   | 1.00     | 747.00   | 81.00   | 105.00  | s__Streptococcus_sp._GDLAMI-SD2           |
| OTU4574 | 369.00  | 76.00   | 437.00   | 192.00   | 1.00    | 10.00   | s__Clostridium sensu stricto_unclassified |
| OTU74   | 93.00   | 120.00  | 126.00   | 1373.00  | 309.00  | 393.00  | s__Gemella_unclassified                   |
| OTU326  | 1.00    | 1.00    | 5.00     | 6.00     | 34.00   | 9.00    | s__Lactobacillus_unclassified             |
| OTU330  | 1.00    | 4.00    | 3.00     | 778.00   | 195.00  | 997.00  | s__uncultured_Lactobacillus_sp.           |
| OTU48   | 1.00    | 16.00   | 6.00     | 382.00   | 1.00    | 105.00  | s__Lactobacillus_unclassified             |
| OTU4307 | 1743.00 | 59.00   | 468.00   | 635.00   | 9.00    | 13.00   | s__Clostridiaceae_1_unclassified          |
| OTU8197 | 175.00  | 250.00  | 243.00   | 90.00    | 1.00    | 9.00    | s__Romboutsia_unclassified                |
| OTU1524 | 211.00  | 3.00    | 15.00    | 17.00    | 307.00  | 925.00  | s__Enterobacteriaceae_unclassified        |
| OTU6629 | 161.00  | 170.00  | 326.00   | 30.00    | 3.00    | 3.00    | s__Peptostreptococcaceae_unclassified     |
| OTU5080 | 7.00    | 1.00    | 2.00     | 3.00     | 136.00  | 371.00  | s__Clostridium sensu stricto_unclassified |
| OTU758  | 2.00    | 8.00    | 6.00     | 3.00     | 33.00   | 1.00    | s__Bacillales_unclassified                |

|         |        |       |       |        |         |         |                                           |
|---------|--------|-------|-------|--------|---------|---------|-------------------------------------------|
| OTU110  | 3.00   | 6.00  | 5.00  | 225.00 | 18.00   | 16.00   | s__Streptococcus_unclassified             |
| OTU918  | 13.00  | 9.00  | 17.00 | 2.00   | 19.00   | 23.00   | s__uncultured_Anaerorhabdus_sp.           |
| OTU8368 | 8.00   | 21.00 | 17.00 | 2.00   | 2.00    | 1.00    | s__Romboutsia_unclassified                |
| OTU7737 | 15.00  | 24.00 | 43.00 | 3.00   | 1.00    | 2.00    | s__Romboutsia_unclassified                |
| OTU132  | 7.00   | 3.00  | 10.00 | 108.00 | 10.00   | 19.00   | s__Globicatella_sp._canine_oral_taxon_218 |
| OTU4450 | 347.00 | 17.00 | 90.00 | 111.00 | 1.00    | 6.00    | s__Clostridium_sensu_stricto_unclassified |
| OTU4982 | 39.00  | 73.00 | 5.00  | 334.00 | 254.00  | 270.00  | s__Terrisporobacter_unclassified          |
| OTU3625 | 9.00   | 2.00  | 5.00  | 53.00  | 7.00    | 8.00    | s__Lachnospiraceae_unclassified           |
| OTU4103 | 7.00   | 2.00  | 4.00  | 9.00   | 6237.00 | 8349.00 | s__Peptostreptococcaceae_unclassified     |
| OTU4128 | 65.00  | 15.00 | 4.00  | 815.00 | 11.00   | 21.00   | s__Clostridium_sensu_stricto_unclassified |

---

**Supplementary Table S4 Statistical results of OTUs in feces of AP rats**

| <b>OTU ID</b> | <b>AP_F_1</b> | <b>AP_F_2</b> | <b>AP_F_3</b> | <b>AP_F_4</b> | <b>AP_F_5</b> | <b>AP_F_6</b> | <b>Taxonomy</b>                       |
|---------------|---------------|---------------|---------------|---------------|---------------|---------------|---------------------------------------|
| OTU24         | 107.00        | 72.00         | 8.00          | 132.00        | 142.00        | 58.00         | s__Lactobacillus_unclassified         |
| OTU448        | 14.00         | 258.00        | 664.00        | 18.00         | 10.00         | 203.00        | s__Porphyromonadaceae_unclassified    |
| OTU81         | 15.00         | 515.00        | 733.00        | 652.00        | 97.00         | 310.00        | s__Paraprevotella_unclassified        |
| OTU516        | 18.00         | 747.00        | 320.00        | 215.00        | 33.00         | 171.00        | s__Bacteroidales_unclassified         |
| OTU729        | 15.00         | 212.00        | 327.00        | 127.00        | 82.00         | 270.00        | s__Porphyromonadaceae_unclassified    |
| OTU3605       | 1.00          | 190.00        | 63.00         | 14.00         | 193.00        | 14.00         | s__Roseburia_unclassified             |
| OTU426        | 12.00         | 635.00        | 272.00        | 91.00         | 60.00         | 82.00         | s__Prevotella_unclassified            |
| OTU451        | 14.00         | 312.00        | 219.00        | 262.00        | 156.00        | 411.00        | s__Porphyromonadaceae_unclassified    |
| OTU562        | 8.00          | 250.00        | 97.00         | 161.00        | 328.00        | 112.00        | s__Porphyromonadaceae_unclassified    |
| OTU851        | 21.00         | 95.00         | 59.00         | 51.00         | 47.00         | 82.00         | s__Porphyromonadaceae_unclassified    |
| OTU22         | 28.00         | 1329.00       | 228.00        | 1258.00       | 392.00        | 213.00        | s__Phascolarctobacterium_unclassified |
| OTU3951       | 1.00          | 8.00          | 3.00          | 15.00         | 28.00         | 27.00         | s__Lachnospiraceae_unclassified       |
| OTU377        | 4.00          | 282.00        | 178.00        | 117.00        | 145.00        | 148.00        | s__Porphyromonadaceae_unclassified    |
| OTU624        | 11.00         | 316.00        | 255.00        | 66.00         | 149.00        | 177.00        | s__Porphyromonadaceae_unclassified    |
| OTU420        | 26.00         | 358.00        | 241.00        | 2944.00       | 55.00         | 468.00        | s__Prevotella_unclassified            |
| OTU719        | 16.00         | 171.00        | 118.00        | 1518.00       | 21.00         | 163.00        | s__Prevotella_unclassified            |
| OTU531        | 13.00         | 678.00        | 278.00        | 170.00        | 100.00        | 241.00        | s__Porphyromonadaceae_unclassified    |
| OTU3410       | 2.00          | 10.00         | 12.00         | 3.00          | 29.00         | 23.00         | s__Lachnospiraceae_unclassified       |
| OTU3380       | 9.00          | 124.00        | 102.00        | 17.00         | 159.00        | 115.00        | s__Flavonifractor_unclassified        |

|         |         |        |        |        |        |        |                                           |
|---------|---------|--------|--------|--------|--------|--------|-------------------------------------------|
| OTU4000 | 309.00  | 203.00 | 26.00  | 97.00  | 185.00 | 55.00  | s__Romboutsia_unclassified                |
| OTU838  | 2.00    | 53.00  | 34.00  | 7.00   | 3.00   | 59.00  | s__Barnesiella_unclassified               |
| OTU441  | 1.00    | 67.00  | 39.00  | 16.00  | 52.00  | 77.00  | s__Porphyromonadaceae_unclassified        |
| OTU29   | 546.00  | 40.00  | 184.00 | 779.00 | 30.00  | 454.00 | s__Parasutterella_unclassified            |
| OTU1335 | 2.00    | 18.00  | 40.00  | 5.00   | 1.00   | 8.00   | s__Lachnospiraceae_unclassified           |
| OTU519  | 4.00    | 15.00  | 65.00  | 108.00 | 35.00  | 72.00  | s__Porphyromonadaceae_unclassified        |
| OTU884  | 1.00    | 53.00  | 32.00  | 20.00  | 3.00   | 2.00   | s__Porphyromonadaceae_unclassified        |
| OTU3722 | 3673.00 | 361.00 | 40.00  | 57.00  | 801.00 | 17.00  | s__Clostridium sensu stricto_unclassified |
| OTU600  | 1.00    | 59.00  | 40.00  | 16.00  | 23.00  | 21.00  | s__Porphyromonadaceae_unclassified        |
| OTU586  | 1.00    | 1.00   | 4.00   | 22.00  | 1.00   | 38.00  | s__Porphyromonadaceae_unclassified        |
| OTU25   | 4.00    | 115.00 | 53.00  | 87.00  | 98.00  | 24.00  | s__uncultured_Bilophila_sp.               |
| OTU1223 | 2.00    | 95.00  | 37.00  | 15.00  | 18.00  | 59.00  | s__Porphyromonadaceae_unclassified        |
| OTU881  | 3.00    | 61.00  | 76.00  | 38.00  | 12.00  | 44.00  | s__Porphyromonadaceae_unclassified        |
| OTU494  | 3.00    | 29.00  | 14.00  | 31.00  | 42.00  | 55.00  | s__Porphyromonadaceae_unclassified        |
| OTU8046 | 4.00    | 5.00   | 1.00   | 6.00   | 3.00   | 2.00   | s__uncultured_Lactobacillus_sp.           |
| OTU3871 | 3.00    | 24.00  | 10.00  | 1.00   | 11.00  | 23.00  | s__Helicobacter_unclassified              |
| OTU522  | 5.00    | 69.00  | 40.00  | 175.00 | 47.00  | 55.00  | s__Porphyromonadaceae_unclassified        |
| OTU427  | 16.00   | 16.00  | 1.00   | 22.00  | 25.00  | 9.00   | s__Lactobacillus_murinus                  |
| OTU844  | 1.00    | 87.00  | 37.00  | 16.00  | 22.00  | 14.00  | s__Porphyromonadaceae_unclassified        |
| OTU550  | 16.00   | 37.00  | 64.00  | 103.00 | 51.00  | 115.00 | s__uncultured_Barnesiella_sp.             |
| OTU3459 | 7.00    | 100.00 | 85.00  | 27.00  | 104.00 | 70.00  | s__Oscillibacter_unclassified             |
| OTU808  | 2.00    | 23.00  | 22.00  | 18.00  | 11.00  | 29.00  | s__Porphyromonadaceae_unclassified        |
| OTU3361 | 4.00    | 460.00 | 270.00 | 134.00 | 244.00 | 167.00 | s__Ruminococcaceae_unclassified           |

|         |       |        |        |         |        |        |                                    |
|---------|-------|--------|--------|---------|--------|--------|------------------------------------|
| OTU703  | 4.00  | 95.00  | 38.00  | 37.00   | 153.00 | 68.00  | s__Porphyromonadaceae_unclassified |
| OTU3541 | 8.00  | 58.00  | 73.00  | 10.00   | 73.00  | 114.00 | s__Ruminococcaceae_unclassified    |
| OTU39   | 89.00 | 36.00  | 7.00   | 29.00   | 9.00   | 23.00  | s__Turicibacter_unclassified       |
| OTU846  | 2.00  | 233.00 | 62.00  | 28.00   | 11.00  | 25.00  | s__Bacteroidales_unclassified      |
| OTU3622 | 3.00  | 324.00 | 17.00  | 6.00    | 10.00  | 15.00  | s__Lachnospiraceae_unclassified    |
| OTU765  | 2.00  | 15.00  | 13.00  | 30.00   | 5.00   | 17.00  | s__Porphyromonadaceae_unclassified |
| OTU512  | 49.00 | 654.00 | 584.00 | 1358.00 | 499.00 | 723.00 | s__Bacteroides_unclassified        |
| OTU590  | 5.00  | 42.00  | 21.00  | 76.00   | 6.00   | 70.00  | s__Porphyromonadaceae_unclassified |
| OTU637  | 2.00  | 84.00  | 12.00  | 7.00    | 9.00   | 11.00  | s__uncultured_Barnesiella_sp.      |
| OTU533  | 3.00  | 111.00 | 89.00  | 41.00   | 63.00  | 134.00 | s__Parabacteroides_unclassified    |
| OTU3627 | 3.00  | 27.00  | 16.00  | 2.00    | 78.00  | 58.00  | s__Oscillibacter_unclassified      |
| OTU3993 | 3.00  | 1.00   | 5.00   | 1.00    | 1.00   | 2.00   | s__Ruminococcaceae_unclassified    |
| OTU629  | 4.00  | 159.00 | 42.00  | 134.00  | 53.00  | 48.00  | s__Porphyromonadaceae_unclassified |
| OTU567  | 9.00  | 126.00 | 92.00  | 72.00   | 148.00 | 69.00  | s__Porphyromonadaceae_unclassified |
| OTU696  | 1.00  | 81.00  | 60.00  | 125.00  | 6.00   | 67.00  | s__Porphyromonadaceae_unclassified |
| OTU988  | 1.00  | 7.00   | 3.00   | 3.00    | 3.00   | 1.00   | s__Porphyromonadaceae_unclassified |
| OTU738  | 1.00  | 44.00  | 27.00  | 18.00   | 72.00  | 2.00   | s__Porphyromonadaceae_unclassified |
| OTU572  | 1.00  | 9.00   | 7.00   | 13.00   | 1.00   | 20.00  | s__Porphyromonadaceae_unclassified |
| OTU3397 | 3.00  | 33.00  | 21.00  | 3.00    | 47.00  | 14.00  | s__Lachnospiraceae_unclassified    |
| OTU3833 | 1.00  | 12.00  | 33.00  | 1.00    | 2.00   | 97.00  | s__Bacteroidales_unclassified      |
| OTU507  | 12.00 | 71.00  | 26.00  | 78.00   | 9.00   | 102.00 | s__Porphyromonadaceae_unclassified |
| OTU3381 | 5.00  | 25.00  | 53.00  | 46.00   | 232.00 | 55.00  | s__Ruminococcaceae_unclassified    |
| OTU1123 | 1.00  | 34.00  | 43.00  | 12.00   | 1.00   | 2.00   | s__Porphyromonadaceae_unclassified |



|         |        |        |        |        |        |        |                                    |
|---------|--------|--------|--------|--------|--------|--------|------------------------------------|
| OTU643  | 6.00   | 174.00 | 137.00 | 53.00  | 96.00  | 85.00  | s__Porphyromonadaceae_unclassified |
| OTU649  | 5.00   | 74.00  | 83.00  | 69.00  | 167.00 | 83.00  | s__Porphyromonadaceae_unclassified |
| OTU615  | 2.00   | 4.00   | 9.00   | 17.00  | 9.00   | 12.00  | s__Porphyromonadaceae_unclassified |
| OTU837  | 1.00   | 7.00   | 40.00  | 14.00  | 3.00   | 15.00  | s__Porphyromonadaceae_unclassified |
| OTU873  | 2.00   | 2.00   | 7.00   | 6.00   | 1.00   | 6.00   | s__Porphyromonadaceae_unclassified |
| OTU3434 | 3.00   | 163.00 | 223.00 | 1.00   | 14.00  | 81.00  | s__Firmicutes_unclassified         |
| OTU1243 | 4.00   | 7.00   | 17.00  | 20.00  | 1.00   | 4.00   | s__Porphyromonadaceae_unclassified |
| OTU127  | 2.00   | 3.00   | 1.00   | 1.00   | 4.00   | 1.00   | s__Mycoplasma_sualvi               |
| OTU1006 | 14.00  | 267.00 | 158.00 | 188.00 | 4.00   | 8.00   | s__Porphyromonadaceae_unclassified |
| OTU3494 | 2.00   | 65.00  | 25.00  | 4.00   | 14.00  | 38.00  | s__Ruminococcaceae_unclassified    |
| OTU4019 | 9.00   | 159.00 | 52.00  | 2.00   | 140.00 | 63.00  | s__Lachnospiraceae_unclassified    |
| OTU462  | 1.00   | 83.00  | 59.00  | 70.00  | 7.00   | 25.00  | s__Porphyromonadaceae_unclassified |
| OTU26   | 335.00 | 87.00  | 56.00  | 128.00 | 23.00  | 227.00 | s__Parasutterella_unclassified     |
| OTU7833 | 2.00   | 45.00  | 26.00  | 76.00  | 4.00   | 32.00  | s__Porphyromonadaceae_unclassified |
| OTU558  | 3.00   | 52.00  | 63.00  | 74.00  | 14.00  | 74.00  | s__Parabacteroides_unclassified    |
| OTU3905 | 1.00   | 154.00 | 47.00  | 107.00 | 91.00  | 29.00  | s__Bacteroidetes_unclassified      |
| OTU3862 | 2.00   | 17.00  | 28.00  | 3.00   | 65.00  | 7.00   | s__Ruminococcaceae_unclassified    |
| OTU653  | 1.00   | 37.00  | 8.00   | 6.00   | 31.00  | 24.00  | s__Barnesiella_unclassified        |
| OTU3396 | 4.00   | 98.00  | 145.00 | 79.00  | 25.00  | 102.00 | s__Ruminococcaceae_unclassified    |
| OTU8    | 126.00 | 17.00  | 6.00   | 82.00  | 81.00  | 40.00  | s__Lactobacillus_mucosae           |
| OTU3445 | 2.00   | 66.00  | 45.00  | 43.00  | 19.00  | 13.00  | s__Ruminococcaceae_unclassified    |
| OTU744  | 10.00  | 210.00 | 85.00  | 225.00 | 12.00  | 78.00  | s__Prevotellaceae_unclassified     |
| OTU27   | 2.00   | 21.00  | 14.00  | 27.00  | 45.00  | 15.00  | s__uncultured_Bilophila_sp.        |

|         |         |         |         |        |         |         |                                    |
|---------|---------|---------|---------|--------|---------|---------|------------------------------------|
| OTU683  | 1.00    | 34.00   | 11.00   | 9.00   | 50.00   | 11.00   | s__Porphyromonadaceae_unclassified |
| OTU3395 | 1.00    | 7.00    | 21.00   | 4.00   | 9.00    | 45.00   | s__Clostridium_IV_unclassified     |
| OTU3615 | 3.00    | 762.00  | 15.00   | 14.00  | 6.00    | 254.00  | s__Firmicutes_unclassified         |
| OTU3452 | 1.00    | 24.00   | 6.00    | 4.00   | 8.00    | 16.00   | s__Ruminococcaceae_unclassified    |
| OTU8104 | 2.00    | 21.00   | 4.00    | 6.00   | 23.00   | 8.00    | s__Bacteroidales_unclassified      |
| OTU2605 | 1.00    | 5.00    | 1.00    | 1.00   | 1.00    | 5.00    | s__Porphyromonadaceae_unclassified |
| OTU3818 | 1.00    | 7.00    | 3.00    | 7.00   | 117.00  | 177.00  | s__Lachnospiraceae_unclassified    |
| OTU3774 | 18.00   | 105.00  | 103.00  | 114.00 | 224.00  | 210.00  | s__Clostridiales_unclassified      |
| OTU7838 | 137.00  | 50.00   | 19.00   | 73.00  | 2.00    | 2.00    | s__Sutterellaceae_unclassified     |
| OTU31   | 111.00  | 38.00   | 10.00   | 16.00  | 59.00   | 37.00   | s__Lactobacillus_unclassified      |
| OTU418  | 21.00   | 151.00  | 189.00  | 195.00 | 101.00  | 198.00  | s__Parabacteroides_unclassified    |
| OTU438  | 139.00  | 563.00  | 1024.00 | 304.00 | 134.00  | 1203.00 | s__Bacteroides_unclassified        |
| OTU3428 | 5.00    | 35.00   | 118.00  | 10.00  | 32.00   | 43.00   | s__Oscillibacter_unclassified      |
| OTU4664 | 4.00    | 64.00   | 50.00   | 4.00   | 30.00   | 27.00   | s__Lachnospiraceae_unclassified    |
| OTU440  | 10.00   | 42.00   | 19.00   | 19.00  | 4.00    | 145.00  | s__Alistipes_unclassified          |
| OTU20   | 2589.00 | 1607.00 | 2179.00 | 228.00 | 2825.00 | 576.00  | s__Escherichia_unclassified        |
| OTU541  | 11.00   | 13.00   | 11.00   | 83.00  | 6.00    | 93.00   | s__Bacteroides_uniformis           |
| OTU771  | 8.00    | 100.00  | 281.00  | 33.00  | 40.00   | 253.00  | s__Bacteroidales_unclassified      |
| OTU3402 | 6.00    | 823.00  | 17.00   | 25.00  | 143.00  | 181.00  | s__Ruminococcaceae_unclassified    |
| OTU3601 | 2.00    | 22.00   | 7.00    | 8.00   | 28.00   | 16.00   | s__uncultured_Barnesiella_sp.      |
| OTU4008 | 1.00    | 14.00   | 2.00    | 10.00  | 14.00   | 18.00   | s__Coriobacteriaceae_unclassified  |
| OTU62   | 2113.00 | 213.00  | 33.00   | 90.00  | 114.00  | 89.00   | s__Allobaculum_unclassified        |
| OTU601  | 5.00    | 24.00   | 25.00   | 4.00   | 1.00    | 22.00   | s__Porphyromonadaceae_unclassified |

|         |        |        |        |        |        |        |                                           |
|---------|--------|--------|--------|--------|--------|--------|-------------------------------------------|
| OTU431  | 48.00  | 310.00 | 411.00 | 243.00 | 156.00 | 502.00 | s__Bacteroides_unclassified               |
| OTU3454 | 1.00   | 17.00  | 24.00  | 13.00  | 14.00  | 12.00  | s__Intestinimonas_unclassified            |
| OTU523  | 2.00   | 272.00 | 22.00  | 23.00  | 29.00  | 41.00  | s__uncultured_Barnesiella_sp.             |
| OTU477  | 5.00   | 37.00  | 9.00   | 5.00   | 9.00   | 67.00  | s__Alistipes_unclassified                 |
| OTU3464 | 1.00   | 6.00   | 8.00   | 1.00   | 2.00   | 12.00  | s__Ruminococcaceae_unclassified           |
| OTU4574 | 975.00 | 120.00 | 14.00  | 25.00  | 154.00 | 5.00   | s__Clostridium sensu stricto_unclassified |
| OTU432  | 78.00  | 30.00  | 10.00  | 61.00  | 14.00  | 254.00 | s__Bacteroides_unclassified               |
| OTU125  | 13.00  | 8.00   | 5.00   | 1.00   | 72.00  | 27.00  | s__uncultured_Allobaculum_sp.             |
| OTU3409 | 1.00   | 21.00  | 9.00   | 2.00   | 30.00  | 12.00  | s__Ruminococcaceae_unclassified           |
| OTU842  | 1.00   | 1.00   | 4.00   | 2.00   | 11.00  | 53.00  | s__Porphyromonadaceae_unclassified        |
| OTU3680 | 17.00  | 21.00  | 2.00   | 123.00 | 20.00  | 222.00 | s__Clostridium XIVa_unclassified          |
| OTU1795 | 1.00   | 6.00   | 5.00   | 3.00   | 1.00   | 5.00   | s__Porphyromonadaceae_unclassified        |
| OTU4288 | 1.00   | 7.00   | 3.00   | 1.00   | 5.00   | 7.00   | s__Lachnospiraceae_unclassified           |
| OTU48   | 27.00  | 8.00   | 1.00   | 7.00   | 17.00  | 1.00   | s__Lactobacillus_unclassified             |
| OTU3703 | 580.00 | 84.00  | 13.00  | 39.00  | 42.00  | 23.00  | s__Erysipelotrichaceae_unclassified       |
| OTU2096 | 4.00   | 10.00  | 5.00   | 8.00   | 7.00   | 12.00  | s__Porphyromonadaceae_unclassified        |
| OTU46   | 861.00 | 36.00  | 51.00  | 38.00  | 96.00  | 104.00 | s__Allobaculum_unclassified               |
| OTU702  | 1.00   | 3.00   | 3.00   | 5.00   | 1.00   | 2.00   | s__Porphyromonadaceae_unclassified        |
| OTU499  | 26.00  | 6.00   | 60.00  | 31.00  | 292.00 | 171.00 | s__Bacteroides_unclassified               |
| OTU4228 | 1.00   | 11.00  | 8.00   | 2.00   | 3.00   | 14.00  | s__Ruminococcus2_unclassified             |
| OTU5069 | 1.00   | 3.00   | 13.00  | 1.00   | 3.00   | 2.00   | s__Clostridiales_unclassified             |
| OTU1318 | 1.00   | 1.00   | 8.00   | 15.00  | 2.00   | 15.00  | s__Lachnospiraceae_unclassified           |
| OTU75   | 1.00   | 1.00   | 5.00   | 1.00   | 1.00   | 17.00  | s__Enterococcus_faecalis                  |

|         |         |        |        |        |         |        |                                           |
|---------|---------|--------|--------|--------|---------|--------|-------------------------------------------|
| OTU3345 | 16.00   | 7.00   | 3.00   | 7.00   | 6.00    | 60.00  | s__Olsenella_unclassified                 |
| OTU3731 | 1.00    | 4.00   | 6.00   | 17.00  | 4.00    | 16.00  | s__Ruminococcaceae_unclassified           |
| OTU850  | 7.00    | 57.00  | 51.00  | 572.00 | 7.00    | 49.00  | s__uncultured_Prevotella_sp.              |
| OTU1332 | 4.00    | 92.00  | 53.00  | 78.00  | 1.00    | 1.00   | s__Porphyromonadaceae_unclassified        |
| OTU1349 | 3.00    | 35.00  | 22.00  | 14.00  | 17.00   | 34.00  | s__Porphyromonadaceae_unclassified        |
| OTU619  | 5.00    | 34.00  | 15.00  | 26.00  | 12.00   | 93.00  | s__Butyricimonas_unclassified             |
| OTU3970 | 1.00    | 5.00   | 1.00   | 2.00   | 1.00    | 24.00  | s__Clostridium IV_unclassified            |
| OTU3492 | 1.00    | 7.00   | 11.00  | 1.00   | 5.00    | 11.00  | s__Ruminococcaceae_unclassified           |
| OTU1190 | 18.00   | 93.00  | 231.00 | 63.00  | 26.00   | 174.00 | s__Bacteroides_unclassified               |
| OTU1368 | 2.00    | 51.00  | 65.00  | 47.00  | 1.00    | 1.00   | s__Bacteroides_uniformis                  |
| OTU730  | 1.00    | 12.00  | 4.00   | 11.00  | 7.00    | 14.00  | s__Butyricimonas_unclassified             |
| OTU3808 | 2.00    | 27.00  | 1.00   | 8.00   | 15.00   | 27.00  | s__Clostridiales_unclassified             |
| OTU3785 | 4289.00 | 7.00   | 8.00   | 53.00  | 2553.00 | 50.00  | s__Clostridium sensu stricto_unclassified |
| OTU1524 | 1010.00 | 627.00 | 840.00 | 80.00  | 19.00   | 4.00   | s__Enterobacteriaceae_unclassified        |
| OTU3379 | 40.00   | 9.00   | 87.00  | 19.00  | 1.00    | 542.00 | s__Fusobacterium_unclassified             |
| OTU5333 | 1.00    | 57.00  | 38.00  | 53.00  | 8.00    | 34.00  | s__Porphyromonadaceae_unclassified        |
| OTU106  | 2.00    | 30.00  | 1.00   | 31.00  | 61.00   | 33.00  | s__Allobaculum_unclassified               |
| OTU21   | 283.00  | 6.00   | 134.00 | 11.00  | 10.00   | 737.00 | s__Proteus_unclassified                   |
| OTU4793 | 2.00    | 157.00 | 65.00  | 55.00  | 3.00    | 36.00  | s__Bacteria_unclassified                  |
| OTU88   | 11.00   | 2.00   | 16.00  | 2.00   | 1.00    | 46.00  | s__Pasteurellaceae_unclassified           |
| OTU110  | 25.00   | 9.00   | 1.00   | 5.00   | 1.00    | 3.00   | s__Streptococcus_unclassified             |
| OTU1636 | 2.00    | 33.00  | 9.00   | 68.00  | 2.00    | 1.00   | s__Porphyromonadaceae_unclassified        |
| OTU3481 | 3.00    | 61.00  | 22.00  | 3.00   | 44.00   | 9.00   | s__Ruminococcaceae_unclassified           |

|         |       |        |       |       |       |        |                                                          |
|---------|-------|--------|-------|-------|-------|--------|----------------------------------------------------------|
| OTU55   | 1.00  | 267.00 | 2.00  | 22.00 | 91.00 | 6.00   | s__Allobaculum_unclassified                              |
| OTU8499 | 60.00 | 42.00  | 80.00 | 12.00 | 42.00 | 9.00   | s__Enterobacteriaceae_unclassified                       |
| OTU3723 | 88.00 | 2.00   | 42.00 | 4.00  | 4.00  | 268.00 | s__Proteus_unclassified                                  |
| OTU4399 | 2.00  | 33.00  | 28.00 | 43.00 | 28.00 | 9.00   | s__Proteobacteria_unclassified                           |
| OTU1503 | 2.00  | 16.00  | 38.00 | 3.00  | 1.00  | 4.00   | s__Porphyromonadaceae_unclassified                       |
| OTU348  | 31.00 | 10.00  | 1.00  | 3.00  | 11.00 | 5.00   | s__Peptostreptococcaceae_unclassified                    |
| OTU3712 | 1.00  | 60.00  | 46.00 | 36.00 | 14.00 | 20.00  | s__Bacteroidetes_unclassified                            |
| OTU977  | 5.00  | 129.00 | 67.00 | 32.00 | 34.00 | 96.00  | s__Porphyromonadaceae_unclassified                       |
| OTU926  | 3.00  | 3.00   | 10.00 | 8.00  | 8.00  | 27.00  | s__uncultured_Parabacteroides_sp.                        |
| OTU3883 | 1.00  | 1.00   | 5.00  | 8.00  | 39.00 | 15.00  | s__Lachnospiraceae_unclassified                          |
| OTU1115 | 5.00  | 3.00   | 3.00  | 30.00 | 38.00 | 14.00  | s__Bifidobacterium_unclassified                          |
| OTU5052 | 1.00  | 125.00 | 37.00 | 98.00 | 73.00 | 26.00  | s__Bacteroidetes_unclassified                            |
| OTU3575 | 2.00  | 53.00  | 84.00 | 47.00 | 12.00 | 37.00  | s__Paraprevotella_unclassified                           |
| OTU843  | 1.00  | 10.00  | 8.00  | 2.00  | 7.00  | 4.00   | s__Porphyromonadaceae_unclassified                       |
| OTU2633 | 1.00  | 5.00   | 8.00  | 3.00  | 4.00  | 11.00  | s__uncultured_Parabacteroides_sp.                        |
| OTU478  | 3.00  | 1.00   | 4.00  | 11.00 | 8.00  | 219.00 | s__Bacteroides_unclassified                              |
| OTU1230 | 2.00  | 24.00  | 6.00  | 19.00 | 2.00  | 6.00   | s__Bacteroidales_unclassified                            |
| OTU1364 | 1.00  | 14.00  | 5.00  | 8.00  | 1.00  | 1.00   | s__Porphyromonadaceae_unclassified                       |
| OTU3437 | 2.00  | 12.00  | 20.00 | 1.00  | 15.00 | 18.00  | s__Ruminococcaceae_unclassified                          |
| OTU3651 | 10.00 | 2.00   | 77.00 | 19.00 | 66.00 | 43.00  | s__Lachnospiraceae_unclassified                          |
| OTU3315 | 4.00  | 42.00  | 13.00 | 25.00 | 1.00  | 21.00  | s__Bacteroidetes_unclassified                            |
| OTU3724 | 2.00  | 5.00   | 37.00 | 12.00 | 7.00  | 58.00  | s__Clostridiales_Family_XIII_Incertae_Sedis_unclassified |
| OTU4188 | 8.00  | 4.00   | 5.00  | 21.00 | 14.00 | 29.00  | s__Lachnospiraceae_unclassified                          |

|         |        |        |        |        |         |        |                                           |
|---------|--------|--------|--------|--------|---------|--------|-------------------------------------------|
| OTU1150 | 1.00   | 15.00  | 11.00  | 137.00 | 1.00    | 6.00   | s__uncultured_Prevotella_sp.              |
| OTU3393 | 8.00   | 11.00  | 132.00 | 8.00   | 12.00   | 143.00 | s__Clostridium IV_unclassified            |
| OTU4317 | 1.00   | 2.00   | 43.00  | 4.00   | 7.00    | 23.00  | s__Ruminococcaceae_unclassified           |
| OTU3404 | 1.00   | 51.00  | 21.00  | 4.00   | 2.00    | 36.00  | s__Ruminococcaceae_unclassified           |
| OTU3889 | 20.00  | 91.00  | 118.00 | 129.00 | 171.00  | 266.00 | s__Clostridium XIVa_unclassified          |
| OTU76   | 1.00   | 2.00   | 2.00   | 8.00   | 20.00   | 1.00   | s__Citrobacter_unclassified               |
| OTU781  | 2.00   | 59.00  | 58.00  | 8.00   | 9.00    | 66.00  | s__Bacteroides_unclassified               |
| OTU3811 | 6.00   | 221.00 | 173.00 | 116.00 | 119.00  | 164.00 | s__Blautia_unclassified                   |
| OTU695  | 2.00   | 81.00  | 71.00  | 343.00 | 165.00  | 19.00  | s__uncultured_Bacteroides_sp.             |
| OTU36   | 2.00   | 6.00   | 7.00   | 50.00  | 283.00  | 34.00  | s__Clostridium XVIII_unclassified         |
| OTU485  | 178.00 | 825.00 | 653.00 | 11.00  | 280.00  | 639.00 | s__Bacteroides_uniformis                  |
| OTU654  | 15.00  | 25.00  | 12.00  | 38.00  | 8.00    | 114.00 | s__Bacteroides_salyersiae                 |
| OTU1458 | 1.00   | 2.00   | 1.00   | 2.00   | 47.00   | 32.00  | s__Porphyromonadaceae_unclassified        |
| OTU2701 | 1.00   | 17.00  | 14.00  | 8.00   | 3.00    | 11.00  | s__Porphyromonadaceae_unclassified        |
| OTU3547 | 1.00   | 1.00   | 1.00   | 4.00   | 3.00    | 2.00   | s__Ruminococcaceae_unclassified           |
| OTU3603 | 1.00   | 1.00   | 2.00   | 2.00   | 3.00    | 4.00   | s__Ruminococcaceae_unclassified           |
| OTU4042 | 3.00   | 5.00   | 8.00   | 31.00  | 55.00   | 28.00  | s__Blautia_unclassified                   |
| OTU4103 | 10.00  | 1.00   | 3.00   | 1.00   | 2415.00 | 1.00   | s__Peptostreptococcaceae_unclassified     |
| OTU4118 | 2.00   | 7.00   | 5.00   | 8.00   | 11.00   | 10.00  | s__Ruminococcaceae_unclassified           |
| OTU4128 | 16.00  | 10.00  | 18.00  | 20.00  | 97.00   | 1.00   | s__Clostridium sensu stricto_unclassified |
| OTU4369 | 2.00   | 2.00   | 1.00   | 16.00  | 231.00  | 6.00   | s__Clostridium sensu stricto_unclassified |
| OTU4621 | 3.00   | 13.00  | 22.00  | 20.00  | 29.00   | 8.00   | s__Bacteria_unclassified                  |

---



**Supplementary Table S6 Analysis of bacterial composition in AP rats at genus level**

| <b>Genus</b>                       | <b>AP_S_1</b> | <b>AP_S_2</b> | <b>AP_S_3</b> | <b>AP_S_4</b> | <b>AP_S_5</b> | <b>AP_S_6</b> | <b>AP_C_1</b> | <b>AP_C_2</b> | <b>AP_C_3</b> | <b>AP_C_4</b> | <b>AP_C_5</b> | <b>AP_C_6</b> | <b>AP_F_1</b> | <b>AP_F_2</b> | <b>AP_F_3</b> | <b>AP_F_4</b> | <b>AP_F_5</b> | <b>AP_F_6</b> |
|------------------------------------|---------------|---------------|---------------|---------------|---------------|---------------|---------------|---------------|---------------|---------------|---------------|---------------|---------------|---------------|---------------|---------------|---------------|---------------|
| Lactobacillus                      | 50.28         | 29.26         | 30.37         | 60.12         | 52.14         | 52.66         | 0.43          | 4.76          | 0.50          | 22.62         | 23.88         | 31.28         | 2.28          | 0.53          | 0.12          | 1.61          | 1.95          | 0.69          |
| Porphyromonadaceae_unclassified    | 0.39          | 0.10          | 0.20          | 0.76          | 2.59          | 2.48          | 0.03          | 0.07          | 0.01          | 0.05          | 0.51          | 0.47          | 1.20          | 19.43         | 21.47         | 16.17         | 12.26         | 18.19         |
| Romboutsia                         | 1.64          | 2.27          | 8.25          | 2.78          | 5.75          | 6.20          | 59.99         | 78.60         | 75.35         | 10.98         | 1.06          | 1.72          | 1.44          | 0.66          | 0.13          | 0.43          | 0.84          | 0.24          |
| Lachnospiraceae_unclassified       | 4.48          | 0.20          | 0.95          | 2.60          | 0.73          | 0.94          | 0.10          | 0.04          | 0.03          | 0.36          | 0.31          | 0.14          | 0.38          | 8.06          | 4.66          | 5.56          | 6.78          | 3.93          |
| Clostridium sensu stricto          | 0.06          | 0.85          | 1.05          | 1.72          | 5.36          | 5.47          | 15.82         | 4.10          | 13.00         | 7.78          | 9.69          | 8.71          | 44.03         | 1.61          | 0.36          | 0.73          | 17.38         | 0.34          |
| Ruminococcaceae_unclassified       | 1.12          | 0.08          | 0.12          | 1.56          | 0.30          | 0.19          | 0.17          | 0.20          | 0.16          | 0.07          | 0.14          | 0.19          | 0.42          | 10.36         | 6.60          | 2.87          | 7.65          | 8.16          |
| Turicibacter                       | 0.26          | 0.84          | 1.08          | 2.23          | 4.15          | 4.19          | 0.08          | 3.82          | 0.29          | 39.87         | 2.27          | 1.93          | 0.39          | 0.11          | 0.03          | 0.12          | 0.04          | 0.10          |
| Prevotella                         | 1.15          | 0.01          | 0.02          | 0.30          | 0.04          | 0.02          | 0.01          | 0.02          | 0.00          | 0.01          | 0.03          | 0.01          | 0.31          | 4.69          | 3.62          | 25.13         | 0.76          | 3.56          |
| Peptostreptococcaceae_unclassified | 0.25          | 0.13          | 0.51          | 0.20          | 0.37          | 0.41          | 3.86          | 4.42          | 5.83          | 0.77          | 37.11         | 35.09         | 0.30          | 0.04          | 0.11          | 0.04          | 10.91         | 0.89          |
| Paraprevotella                     | 0.00          | 0.01          | 0.01          | 0.02          | 0.00          | 0.00          | 0.00          | 0.01          | 0.00          | 0.00          | 0.05          | 0.00          | 0.08          | 1.85          | 3.72          | 3.06          | 0.50          | 1.53          |
| Escherichia                        | 0.03          | 0.13          | 0.21          | 6.53          | 2.79          | 2.94          | 3.80          | 0.01          | 0.28          | 0.15          | 14.14         | 8.81          | 11.44         | 5.11          | 9.63          | 0.96          | 12.62         | 2.47          |
| Bacteroides                        | 2.01          | 0.41          | 0.48          | 0.23          | 0.08          | 0.02          | 0.00          | 0.02          | 0.02          | 0.21          | 0.41          | 0.31          | 2.55          | 8.98          | 14.85         | 11.65         | 7.21          | 18.35         |
| Bacteroidales_unclassified         | 0.35          | 0.00          | 0.02          | 0.14          | 0.15          | 0.27          | 0.00          | 0.03          | 0.00          | 0.01          | 0.01          | 0.06          | 0.19          | 4.97          | 4.96          | 2.77          | 0.78          | 3.08          |
| Clostridiales_unclassified         | 0.05          | 0.06          | 0.12          | 0.89          | 0.76          | 0.66          | 0.08          | 0.18          | 0.08          | 0.02          | 0.06          | 0.11          | 0.31          | 3.54          | 2.05          | 0.92          | 1.72          | 3.23          |
| Bacteria_unclassified              | 2.62          | 0.28          | 1.14          | 0.66          | 0.24          | 0.14          | 0.00          | 0.01          | 0.00          | 0.26          | 0.08          | 0.23          | 0.09          | 2.59          | 2.54          | 0.98          | 0.21          | 0.45          |



|                                     |       |       |       |       |       |       |       |      |      |       |      |      |       |       |       |       |       |       |
|-------------------------------------|-------|-------|-------|-------|-------|-------|-------|------|------|-------|------|------|-------|-------|-------|-------|-------|-------|
| Gemella                             | 0.26  | 15.33 | 4.38  | 0.93  | 0.73  | 0.66  | 0.60  | 0.88 | 0.69 | 4.45  | 1.78 | 1.45 | 0.57  | 0.14  | 0.00  | 0.03  | 0.22  | 0.04  |
| Roseburia                           | 0.49  | 0.00  | 0.01  | 0.10  | 0.03  | 0.03  | 0.00  | 0.01 | 0.00 | 0.00  | 0.01 | 0.00 | 0.00  | 0.63  | 0.30  | 0.07  | 0.87  | 0.07  |
| Coriobacteriaceae<br>_unclassified  | 0.00  | 0.05  | 0.00  | 0.12  | 11.18 | 10.48 | 0.04  | 0.01 | 0.00 | 0.03  | 0.01 | 0.00 | 0.02  | 0.08  | 0.05  | 0.05  | 0.23  | 0.15  |
| Enterobacteriaceae<br>_unclassified | 0.26  | 0.08  | 0.15  | 2.54  | 1.02  | 1.10  | 1.43  | 0.02 | 0.09 | 0.06  | 1.89 | 3.61 | 4.75  | 2.15  | 4.10  | 0.39  | 0.29  | 0.06  |
| Allobaculum                         | 0.06  | 0.10  | 0.09  | 0.73  | 0.80  | 0.50  | 0.06  | 0.01 | 0.00 | 0.10  | 0.02 | 0.06 | 14.56 | 1.80  | 0.41  | 0.79  | 1.95  | 1.12  |
| Others                              | 34.23 | 49.84 | 50.85 | 14.86 | 10.78 | 10.63 | 13.50 | 2.77 | 3.68 | 12.22 | 6.54 | 5.82 | 14.67 | 22.67 | 20.30 | 25.65 | 14.81 | 33.36 |

---
